# Supplementary material for: Genetic structure of swimming boars (Sus scrofa): genome-wide single nucleotide polymorphisms revealed invasion of two lineages into Shodoshima Island
Source: Research Square preprint supplement (doi:10.21203/rs.3.rs-6850685/v1), 2025-07-28
Supplement: Supplementary file 1 [file cfc9bfc538527110fc6629dc.xlsx]

## Sheet: Table S1
Table S1. Information about each sample
Sample ID	Continent	City	City ID	Locality	Sex	MtDNA HP	Index sequence	Number of paired reads
1	Shodoshima	Tonosho	1	Omi	male	A	GGAAGAAGAA	1571080
2	Shodoshima	Tonosho	1	Kou	female	A	GCTTGGTATA	1711906
3	Shodoshima	Shodoshima	2	Noma	female	A	TGATTAGCGA	1626365
4	Shodoshima	Tonosho	1	Kou	male	A	AACCGTTCGG	1562496
5	Shodoshima	Tonosho	1	Fuchizaki	male	A	ATAACGTCAC	1718017
6	Shodoshima	Tonosho	1	Yagatazaki	male	A	TAGTGTGTCT	1576060
7	Shodoshima	Tonosho	1	Omi	female	A	ATCTTCCGAA	1559478
8	Shodoshima	Shodoshima	2	Kamo	female	A	CTAGGTTCAA	1632153
9	Shodoshima	Shodoshima	2	Ikeda	female	A	CGTGCTCATC	1661588
10	Shodoshima	Shodoshima	2	Ikeda	male	A	TCTCTTAGGA	228012
11	Shodoshima	Shodoshima	2	Nishimura	female	A	CCGTTGTTGG	1526950
12	Shodoshima	Shodoshima	2	Futaomote	female	A	GAATACCGAA	1581469
13	Shodoshima	Shodoshima	2	Futaomote	male	A	GTTAATCGCT	1702318
14	Shodoshima	Shodoshima	2	Kamano	female	A	CGGTCAATGC	1621108
15	Shodoshima	Shodoshima	2	Kanoura	male	A	TTCCGAAGCC	1388080
16	Shodoshima	Shodoshima	2	Fukuda	male	A	CTGGCGTATG	1229423
17	Shodoshima	Shodoshima	2	Horikoshi	female	A	TGTTCCTAGA	1859952
18	Shodoshima	Shodoshima	2	Sakate	female	A	AGGAATACGA	1767647
19	Shodoshima	Tonosho	1	Obe	female	B	ATGCACCTGG	1715103
20	Shodoshima	Tonosho	1	Nagahama	female	B	TGTCACACCG	1603754
21	Shodoshima	Tonosho	1	Oe	male	B	GAAGGATTGT	1587964
22	Shodoshima	Tonosho	1	Kamisho	female	B	TCGATCTTCT	1563863
23	Shodoshima	Tonosho	1	Oe	female	B	CCTTGAAGAA	1322459
24	Shodoshima	Tonosho	1	Obe	male	B	GTACTACCAA	1492670
25	Shodoshima	Shodoshima	2	Nakayama	female	B	GCTAGTTGTA	1537503
26	Shodoshima	Shodoshima	2	Kankakedori	female	B	AACGGAGTCC	1658328
27	Shodoshima	Shodoshima	2	Katajo	male	B	GCGCGATGAA	1208629
28	Shodoshima	Shodoshima	2	Yasuda	female	B	TTATGCCTTC	1636803
29	Shodoshima	Shodoshima	2	Iwagatani	female	B	GGATTCGCTT	1549885
30	Shodoshima	Shodoshima	2	Fukuda	female	B	TACCACAGAA	1819023
31	Shodoshima	Tonosho	1	Odeshima	male	A	ACCACAGGAA	1889865
32	Shikoku	Takamatsu	3	Goto	female	A	AACTAGCTGA	1436970
33	Shikoku	Takamatsu	3	Mure	female	A	GGAATCAGTA	1718795
34	Shikoku	Takamatsu	3	Mure	male	A	TCCGATGGAA	1453887
35	Shikoku	Takamatsu	3	Yashimahigashi	female	B	TATGATACGG	1328874
36	Shikoku	Takamatsu	3	Nishiyamasaki	female	D	AGATCCAGTA	1845952
37	Honshu	Okayamaminami	5	Hikosaki	female	C	GCAATGTCGG	1438714
38	Honshu	Ihara	10	Biseichomiyama	female	C	ACGTTCATTC	1584177
39	Honshu	Okayamakita	7	Nishiyamanouchi	female	C	CCTCGGTAGT	1251233
40	Honshu	Kichibichuo	8	Uedanishi	female	C	TATGTGGTGA	1609017
41	Honshu	Kichibichuo	8	Toyokashimo	male	C	TTCATAGACC	1638575
42	Honshu	Misaki	9	Ohaganishi	male	C	TGAAGTAGCA	1394829
43	Honshu	Tamano	4	Hazama	female	D	ATGGCAACCG	1534807
44	Honshu	Kichibichuo	8	Tado	female	D	GGCAACTCAA	1653386
45	Honshu	Kichibichuo	8	Tado	male	D	GCGCAGCTAA	1339455
46	Honshu	Okayamanaka	6	Higashiyama	male	E	CTAGCATGAA	1249871
47	Honshu	Okayamakita	7	Kakehata	male	E	CGACAGCAGT	1401472
48	Honshu	Tamano	4	Mokume	male	F	AATAGGCGAA	1475724

## Sheet: Table S2
Table S2. Details of Primer Mix
Primer name	Sequence [5’→3’]
NE10_301	TAAGAGACAGAAA
NE10_301	TAAGAGACAGAAA
NE10_302	TAAGAGACAGAAC
NE10_303	TAAGAGACAGAAG
NE10_304	TAAGAGACAGAAT
NE10_305	TAAGAGACAGACA
NE10_306	TAAGAGACAGACC
NE10_307	TAAGAGACAGACG
NE10_308	TAAGAGACAGACT
NE10_309	TAAGAGACAGAGA
NE10_310	TAAGAGACAGAGC
NE10_311	TAAGAGACAGAGG
NE10_312	TAAGAGACAGAGT
NE10_313	TAAGAGACAGATA
NE10_314	TAAGAGACAGATC
NE10_315	TAAGAGACAGATG
NE10_316	TAAGAGACAGATT
NE10_317	TAAGAGACAGCAA
NE10_318	TAAGAGACAGCAC
NE10_319	TAAGAGACAGCAG
NE10_320	TAAGAGACAGCAT
NE10_321	TAAGAGACAGCCA
NE10_322	TAAGAGACAGCCC
NE10_323	TAAGAGACAGCCG
NE10_324	TAAGAGACAGCCT
NE10_325	TAAGAGACAGCGA
NE10_326	TAAGAGACAGCGC
NE10_327	TAAGAGACAGCGG
NE10_328	TAAGAGACAGCGT
NE10_329	TAAGAGACAGCTA
NE10_330	TAAGAGACAGCTC
NE10_331	TAAGAGACAGCTG
NE10_332	TAAGAGACAGCTT
NE10_333	TAAGAGACAGGAA
NE10_334	TAAGAGACAGGAC
NE10_335	TAAGAGACAGGAG
NE10_336	TAAGAGACAGGAT
NE10_337	TAAGAGACAGGCA
NE10_338	TAAGAGACAGGCC
NE10_339	TAAGAGACAGGCG
NE10_340	TAAGAGACAGGCT
NE10_341	TAAGAGACAGGGA
NE10_342	TAAGAGACAGGGC
NE10_343	TAAGAGACAGGGG
NE10_344	TAAGAGACAGGGT
NE10_345	TAAGAGACAGGTA
NE10_346	TAAGAGACAGGTC
NE10_347	TAAGAGACAGGTG
NE10_348	TAAGAGACAGGTT
NE10_349	TAAGAGACAGTAA
NE10_350	TAAGAGACAGTAC
NE10_351	TAAGAGACAGTAG
NE10_352	TAAGAGACAGTAT
NE10_353	TAAGAGACAGTCA
NE10_354	TAAGAGACAGTCC
NE10_355	TAAGAGACAGTCG
NE10_356	TAAGAGACAGTCT
NE10_357	TAAGAGACAGTGA
NE10_358	TAAGAGACAGTGC
NE10_359	TAAGAGACAGTGG
NE10_360	TAAGAGACAGTGT
NE10_361	TAAGAGACAGTTA
NE10_362	TAAGAGACAGTTC
NE10_363	TAAGAGACAGTTG
NE10_364	TAAGAGACAGTTT

## Sheet: Table S3
Table S3. Indices of genetic diversity
	Shodoshima	Shikoku	Honshu
Sample size	30	5	12
Number of alleles	1.94	1.76	1.84
Effective number of alleles	1.49	1.47	1.48
Observed heterozygosity	0.28	0.26	0.27
Heterozygosity within population	0.3	0.31	0.3
Inbreeding coefficient	0.06	0.16	0.11
Note that one sample from Odeshima was excluded.

## Sheet: Table S4
Table S4. Results of CV errors for each K in the ADMIXTURE analyses
	K	CV error
Whole study area	2	0.588
	3	0.67
	4	0.652
	5	0.796
Shodoshima	2	0.73
	3	0.885
	4	1.016
	5	1.195
